# Supplementary material for: Elaboration of software requirements documents by means of patterns instantiation
Source: Springer Nature journal article supplement (doi:10.1186/s40411-017-0038-9), 2017-05-30
Supplement: 40411_2017_38_MOESM1_ESM.pdf [file 40411_2017_38_MOESM1_ESM.pdf]

Frame 1. Structure Adopted for Presentation of Patterns

| Element                 | Description                                                                                                                                                                                                                                                                              |
|-------------------------|------------------------------------------------------------------------------------------------------------------------------------------------------------------------------------------------------------------------------------------------------------------------------------------|
| <b>Name</b>             | Specifies the name of the pattern, which must be unique and reflect the applicability of the pattern.                                                                                                                                                                                    |
| <b>Domain</b>           | Corresponds to the pattern application domain.                                                                                                                                                                                                                                           |
| <b>Purpose</b>          | Describes the objective of applying the pattern.                                                                                                                                                                                                                                         |
| <b>Problem</b>          | Describes the situation where the pattern can be applied.                                                                                                                                                                                                                                |
| <b>Consequence</b>      | Describes the consequences of using the pattern.                                                                                                                                                                                                                                         |
| <b>Type</b>             | Specifies the type of requirement: functional, non-functional or business rule.                                                                                                                                                                                                          |
| <b>Solution</b>         | A template is presented for writing the fixed and variable part of the requirement that the pattern must represent. The notation <...> is used to describe the variable part that is called a parameter and must be replaced by the pertinent data for the requirement to be elaborated. |
| <b>Related Patterns</b> | Specifies the related patterns that are complementary to the pattern in question. This element benefits the software engineer by indicating other possible patterns that can be used when using the pattern in question.                                                                 |
