# Supplementary material for: Elaboration of software requirements documents by means of patterns instantiation
Source: Springer Nature journal article supplement (doi:10.1186/s40411-017-0038-9), 2017-05-30
Supplement: 40411_2017_38_MOESM2_ESM.pdf [file 40411_2017_38_MOESM2_ESM.pdf]

## Frame 2. Functional Requirement Pattern: Process Transaction

|                         |                                                                                                                                                                                                                                                                                                                                                                                                                                                                                                                                                                                                                                                                                                                                                                                                                                         |
|-------------------------|-----------------------------------------------------------------------------------------------------------------------------------------------------------------------------------------------------------------------------------------------------------------------------------------------------------------------------------------------------------------------------------------------------------------------------------------------------------------------------------------------------------------------------------------------------------------------------------------------------------------------------------------------------------------------------------------------------------------------------------------------------------------------------------------------------------------------------------------|
| <b>Name</b>             | Process Transaction                                                                                                                                                                                                                                                                                                                                                                                                                                                                                                                                                                                                                                                                                                                                                                                                                     |
| <b>Domain</b>           | Information Systems                                                                                                                                                                                                                                                                                                                                                                                                                                                                                                                                                                                                                                                                                                                                                                                                                     |
| <b>Purpose</b>          | Process and store information from a transaction.                                                                                                                                                                                                                                                                                                                                                                                                                                                                                                                                                                                                                                                                                                                                                                                       |
| <b>Problem</b>          | Establish which transaction data is to be stored.                                                                                                                                                                                                                                                                                                                                                                                                                                                                                                                                                                                                                                                                                                                                                                                       |
| <b>Consequence</b>      | The specification of a requirement that describes the need for the user to process a transaction and store its information.                                                                                                                                                                                                                                                                                                                                                                                                                                                                                                                                                                                                                                                                                                             |
| <b>Type</b>             | Functional                                                                                                                                                                                                                                                                                                                                                                                                                                                                                                                                                                                                                                                                                                                                                                                                                              |
| <b>Solution</b>         | <p><b>Template:</b><br/>Allow processing of &lt;entity&gt; &lt;transaction&gt;, with the storage of the following attributes: &lt;attributes&gt;.</p> <hr/> <p><b>Parameter:</b><br/>&lt;transaction&gt; name of the transaction that contains domain information (1).<br/>&lt;entity&gt; name of the entity that describes the type of transaction (1).<br/>&lt;attributes&gt; name of the entity attributes that must be stored (1..*).</p> <p><b>Parameter Examples:</b><br/>&lt;transaction&gt; sale<br/>&lt;entity&gt; product<br/>&lt;attributes&gt; number, date, client, product, unit price and total price.</p> <hr/> <p><b>Example of Requirement Description:</b><br/>- Allow processing of the product sales, with the storage of the following attributes: number, date, client, product, unit price and total price.</p> |
| <b>Related Patterns</b> | Required Information, Execution Condition, Execution Limit, Value Calculation and Retrieve Information.                                                                                                                                                                                                                                                                                                                                                                                                                                                                                                                                                                                                                                                                                                                                 |
