# Supplementary material for: Elaboration of software requirements documents by means of patterns instantiation
Source: Springer Nature journal article supplement (doi:10.1186/s40411-017-0038-9), 2017-05-30
Supplement: 40411_2017_38_MOESM3_ESM.pdf [file 40411_2017_38_MOESM3_ESM.pdf]

### Frame 3. Business Rule Pattern: Execution Condition

|                         |                                                                                                                                                                                                                                                                                                                                                                                                                                                                                                                                                                                                              |
|-------------------------|--------------------------------------------------------------------------------------------------------------------------------------------------------------------------------------------------------------------------------------------------------------------------------------------------------------------------------------------------------------------------------------------------------------------------------------------------------------------------------------------------------------------------------------------------------------------------------------------------------------|
| <b>Name</b>             | Execution Condition                                                                                                                                                                                                                                                                                                                                                                                                                                                                                                                                                                                          |
| <b>Domain</b>           | Information Systems                                                                                                                                                                                                                                                                                                                                                                                                                                                                                                                                                                                          |
| <b>Purpose</b>          | Establish the conditions allowed for a certain operation.                                                                                                                                                                                                                                                                                                                                                                                                                                                                                                                                                    |
| <b>Problem</b>          | Stipulate the specific conditions of the operation.                                                                                                                                                                                                                                                                                                                                                                                                                                                                                                                                                          |
| <b>Consequence</b>      | The specification of a requirement that describes a business rule which establishes the conditions of execution of a particular operation.                                                                                                                                                                                                                                                                                                                                                                                                                                                                   |
| <b>Type</b>             | Business Rule                                                                                                                                                                                                                                                                                                                                                                                                                                                                                                                                                                                                |
| <b>Solution</b>         | <p><b>Template:</b><br/>The &lt;operation&gt; should only be allowed if &lt;condition&gt;.</p> <p><b>Parameter:</b><br/>&lt;operation&gt; name of the operation you wish to establish a condition for (1).<br/>&lt;condition&gt; description of the condition for execution of the operation (1..*).</p> <p><b>Parameter Examples:</b><br/>&lt;operation&gt; reservation.<br/>&lt;condition&gt; there is enough stock, if there are enough places to meet it.</p> <p><b>Examples of Requirements Description:</b><br/>- The reservation should only be allowed if there are enough vacancies to meet it.</p> |
| <b>Related Patterns</b> | -                                                                                                                                                                                                                                                                                                                                                                                                                                                                                                                                                                                                            |
