# Supplementary material for: Elaboration of software requirements documents by means of patterns instantiation
Source: Springer Nature journal article supplement (doi:10.1186/s40411-017-0038-9), 2017-05-30
Supplement: 40411_2017_38_MOESM4_ESM.pdf [file 40411_2017_38_MOESM4_ESM.pdf]

**Frame 4. Pattern Catalog for the Information Systems Domain**

| <b>Type</b>                   | <b>Name</b>          | <b>Consequence</b>                                                                                                                                   |
|-------------------------------|----------------------|------------------------------------------------------------------------------------------------------------------------------------------------------|
| <b>Basic Operations</b>       | Include Information  | The specification of a requirement that describes the need a user has to store information from a data entity.                                       |
|                               | Change Information   | The specification of a requirement that describes the need a user has to change certain information in a data entity.                                |
|                               | Delete Information   | The specification of a requirement that describes the need a user has to exclude information from a data entity.                                     |
|                               | Retrieve Information | The specification of a requirement that describes the need a user has to retrieve information from a data entity through the parameters description. |
| <b>Transaction Processing</b> | Process Transaction  | The specification of a requirement that describes the need a user has to process a transaction and store its information.                            |
| <b>Management information</b> | Management Query     | The specification of a requirement that describes the need a user has to issue on-screen or printer management information queries.                  |
| <b>Business rules</b>         | Required Information | The specification of a requirement that describes a business rule that establishes the information required by a particular operation.               |
|                               | Execution Condition  | The specification of a requirement that describes a business rule that establishes the conditions of execution of a particular operation.            |
|                               | Execution Limit      | The specification of a requirement that describes a business rule that establishes specific limits for the execution of a particular operation.      |
|                               | Value Calculation    | The specification of a requirement that describes the need a user has to describe a certain mathematical calculation required in an operation.       |
