# Supplementary material for: Elaboration of software requirements documents by means of patterns instantiation
Source: Springer Nature journal article supplement (doi:10.1186/s40411-017-0038-9), 2017-05-30
Supplement: 40411_2017_38_MOESM5_ESM.pdf [file 40411_2017_38_MOESM5_ESM.pdf]

### Frame 5. Sales Order System Overview

The clients must be registered for the issue of orders. The system should only allow placing orders on time for clients who have available credit limits. The system should allow the issue of reports for orders placed on the current date.
